# Supplementary material for: SHANK1 facilitates non-small cell lung cancer processes through modulating the ubiquitination of Klotho by interacting with MDM2
Source: PubMed Central journal article supplement (PMC9039064; doi:10.1038/s41419-022-04860-3), 2022-04-25

Fig 1B

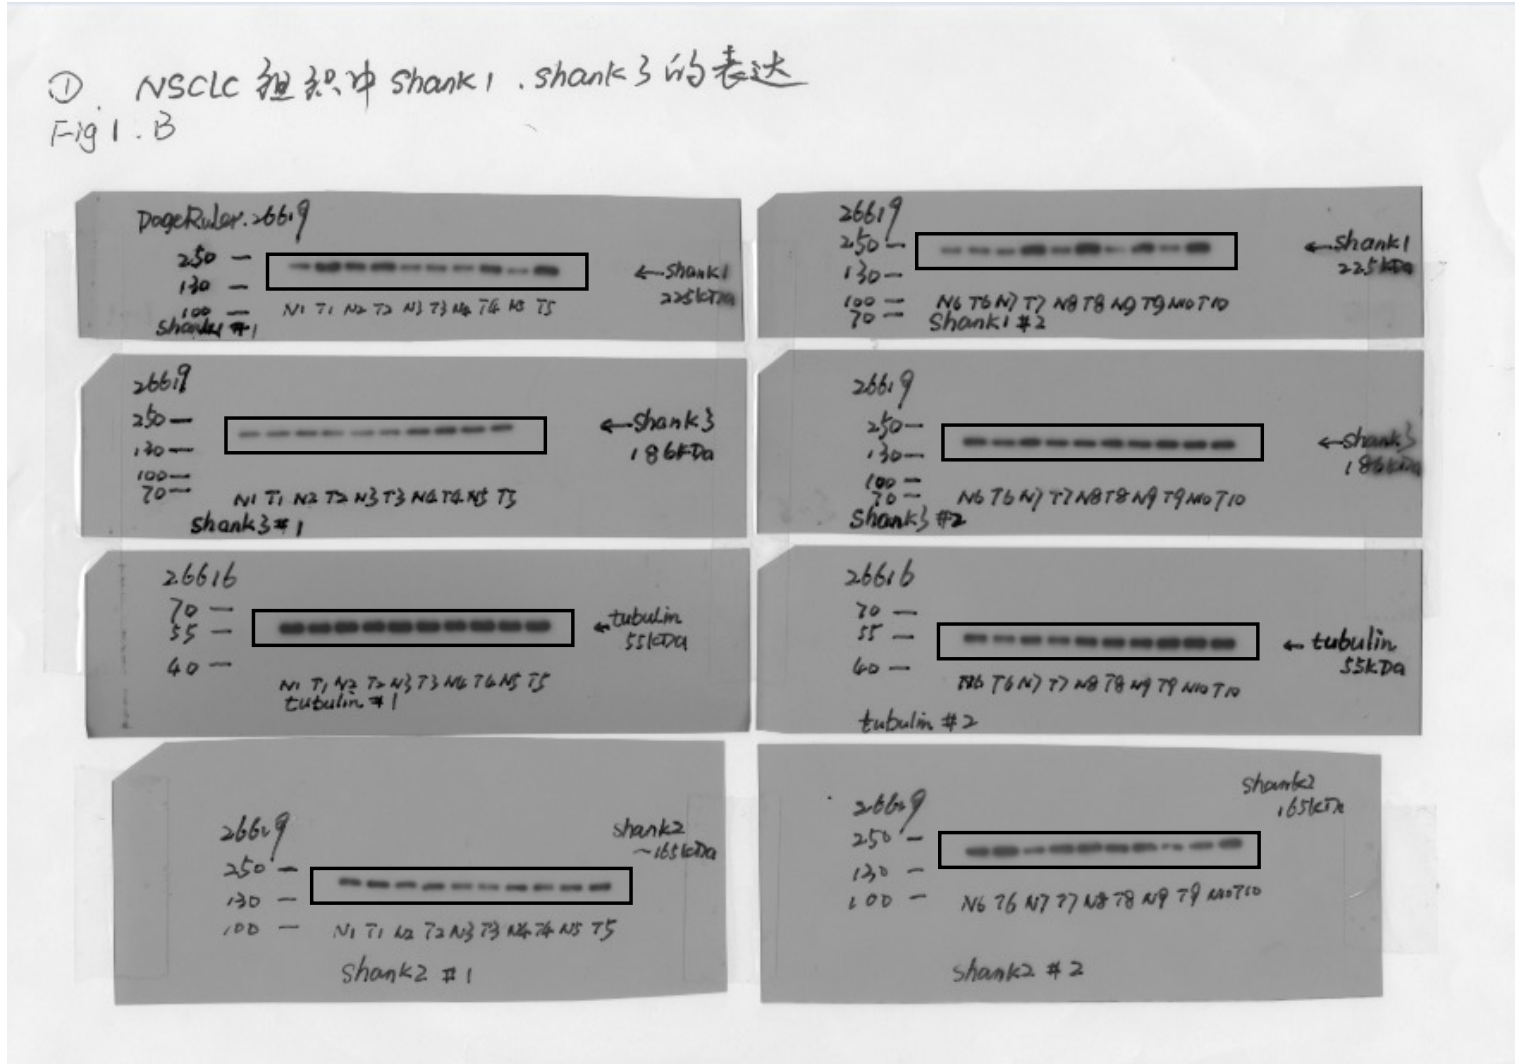

Fig 1F

②. Shank 1 / 2 / 3 在各细胞系中的表达.

Fig 1-F

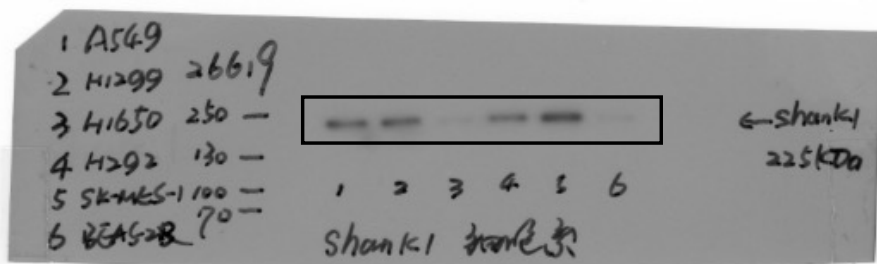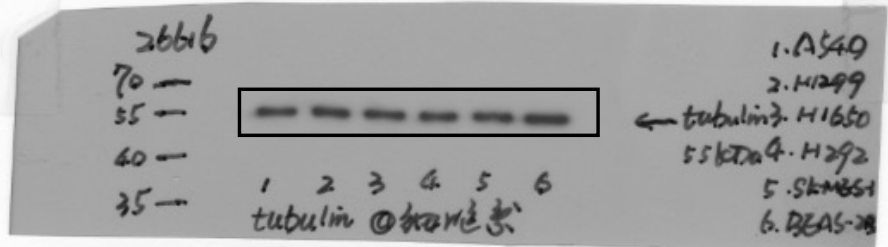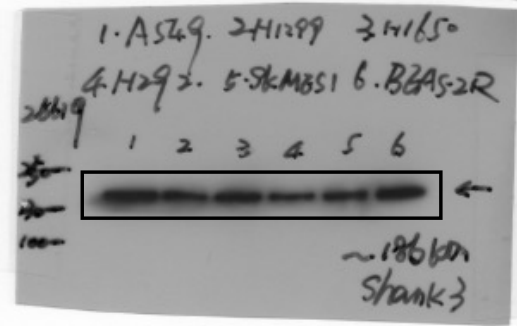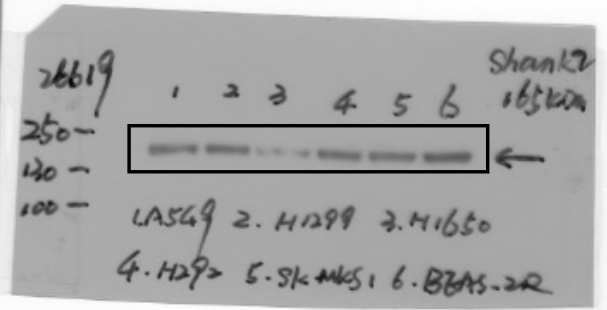

Fig 2B

③ 干扰效率及筛选

Fig2.

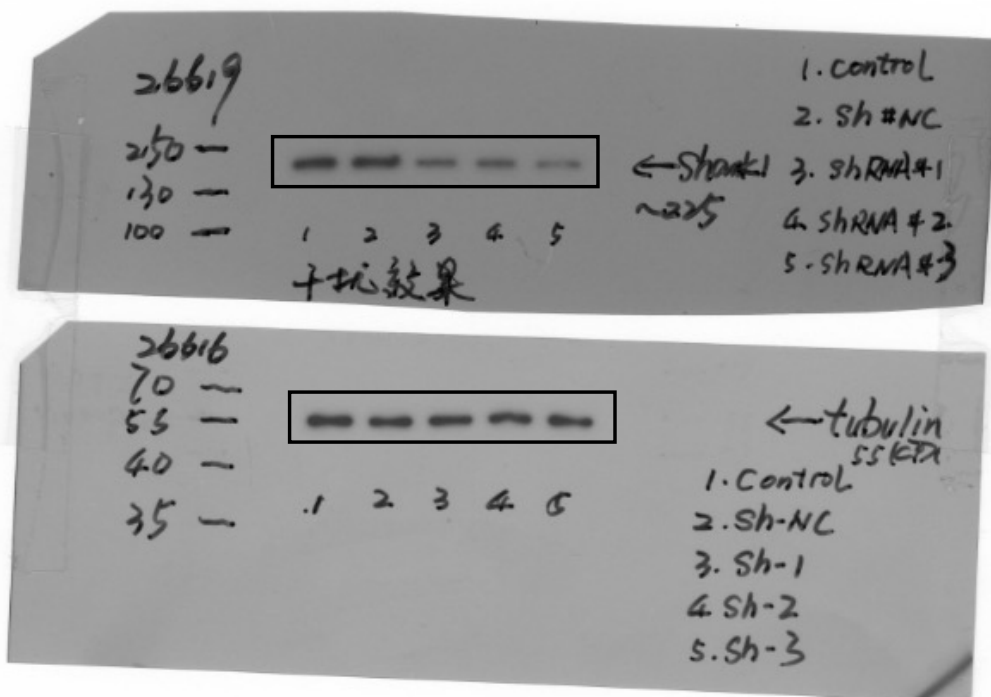

Fig 2J 2K

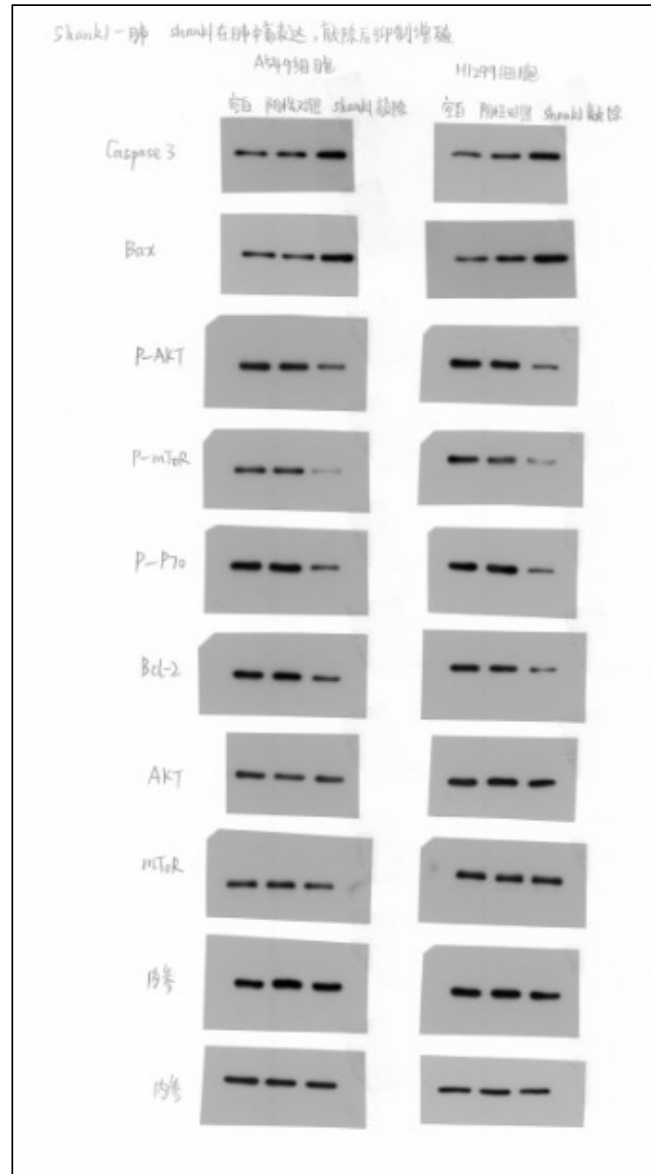

# Fig 3A

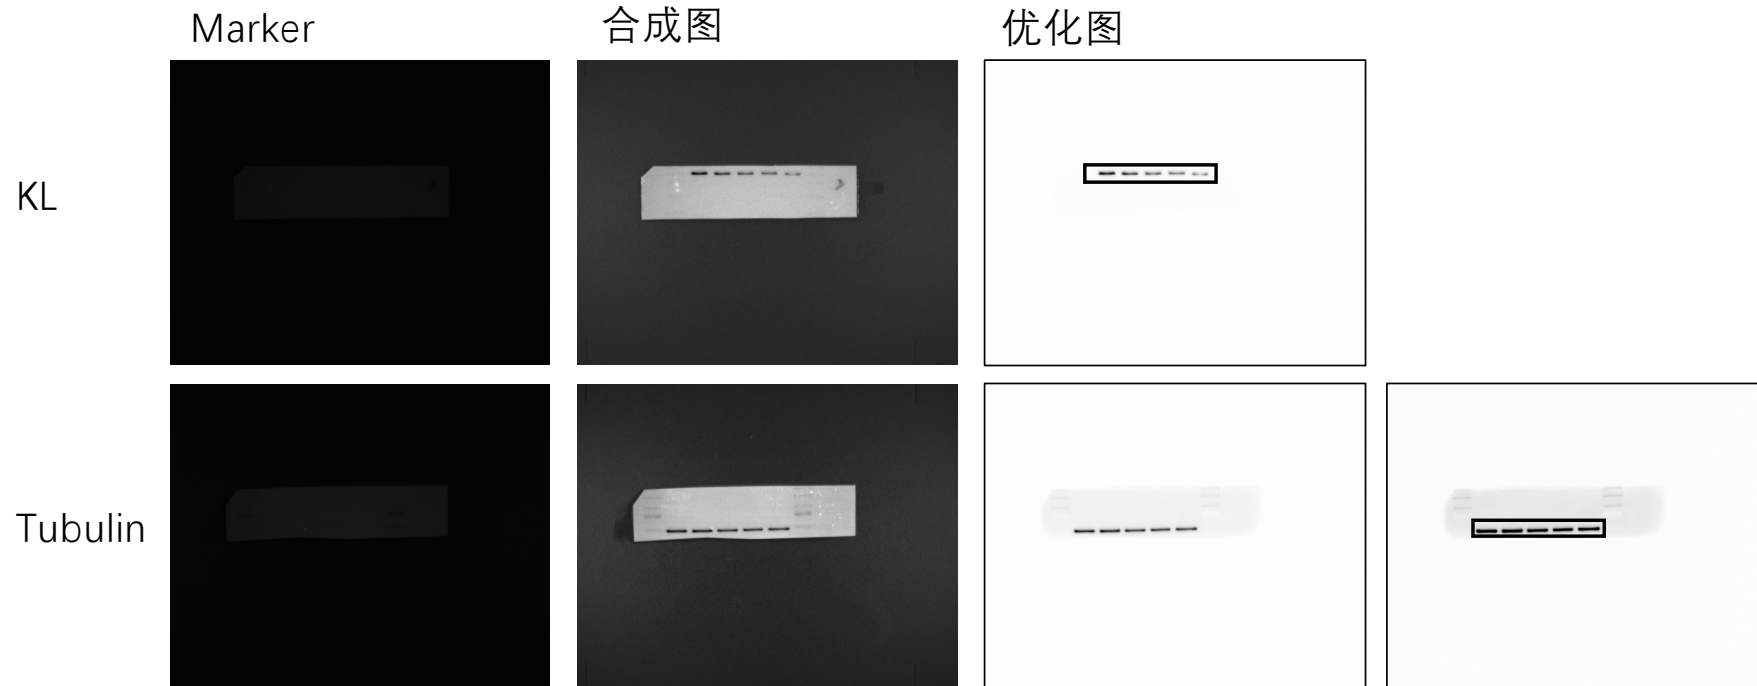

# Fig 3C

Fig 3A① shank1 对 KL 影响

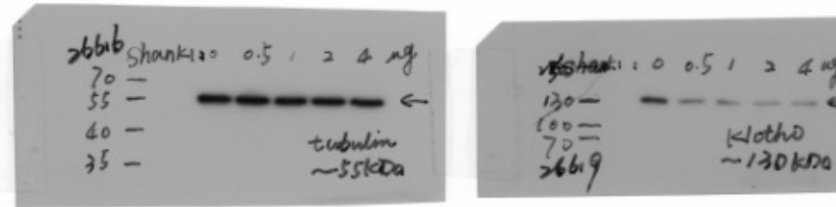

3C.② shank1 与 KL

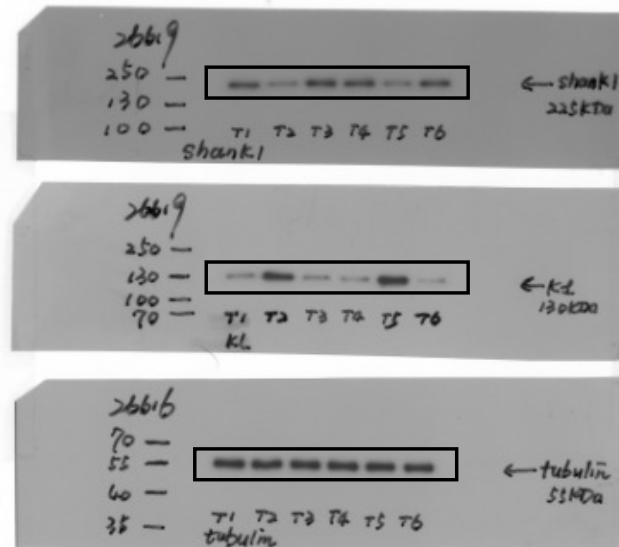

Fig 3E

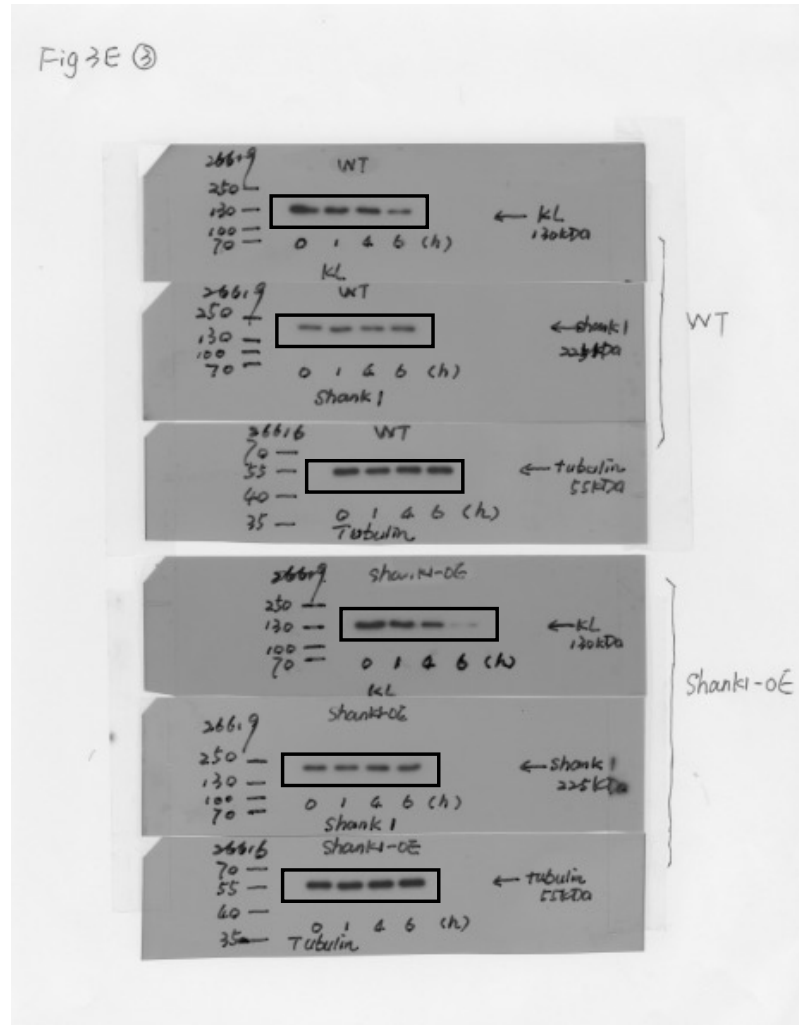

Fig 3G

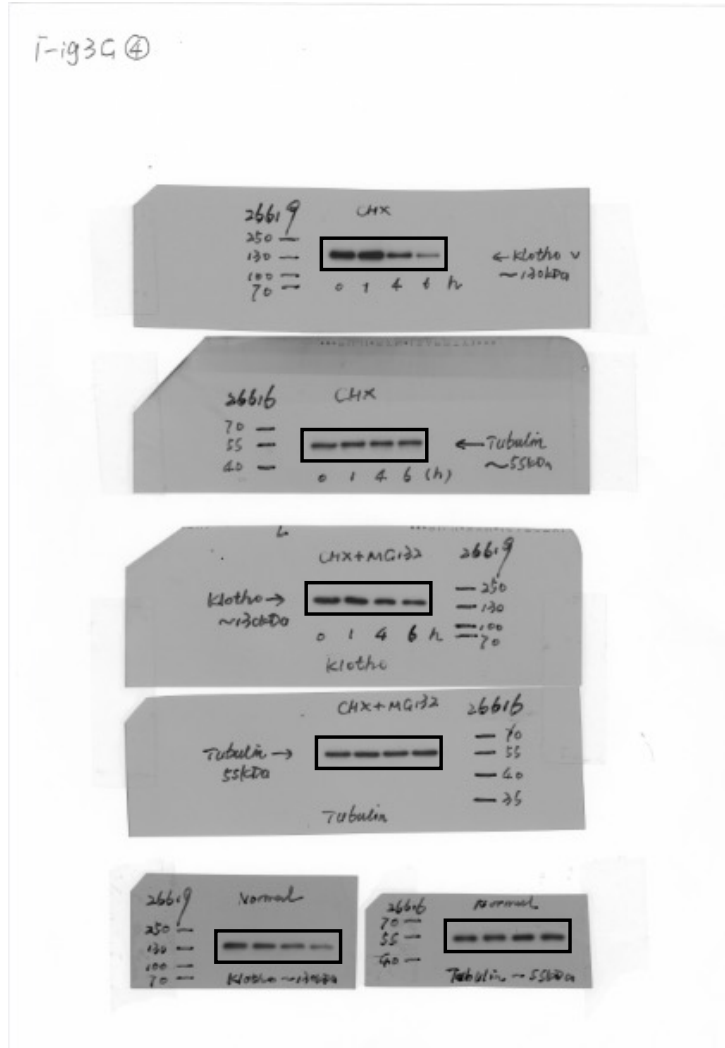



Fig 4A, B

Fig 4A ① IP: KL-Flag ⇒ KL & Shank1.

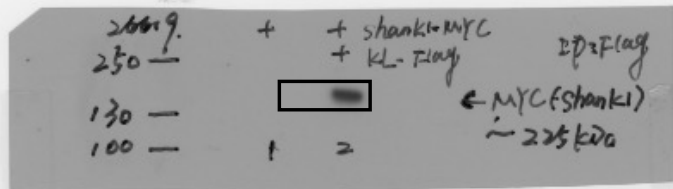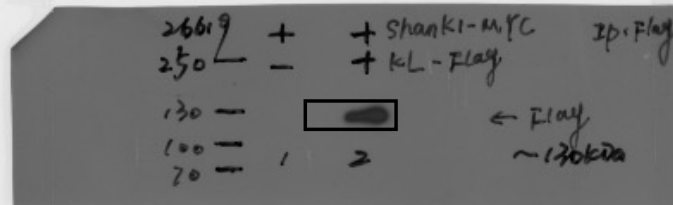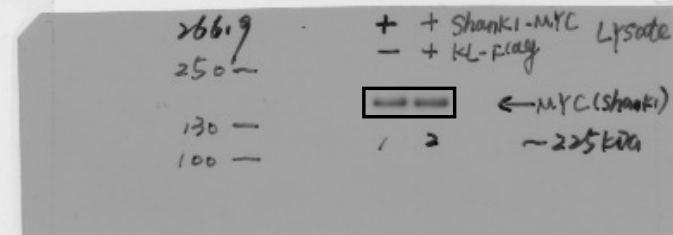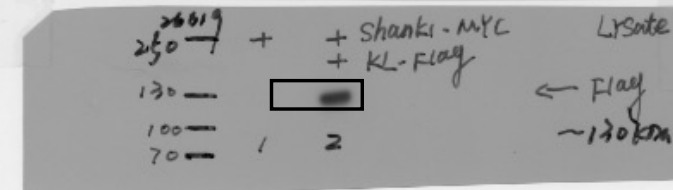

Fig 4B ② IP: anti-KL ⇒ Shank1 & KL.

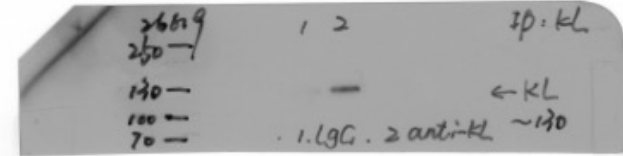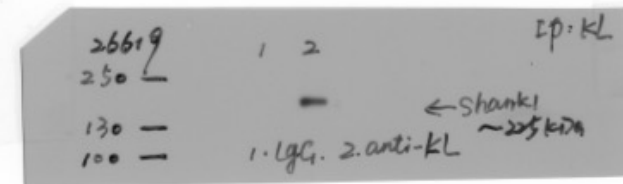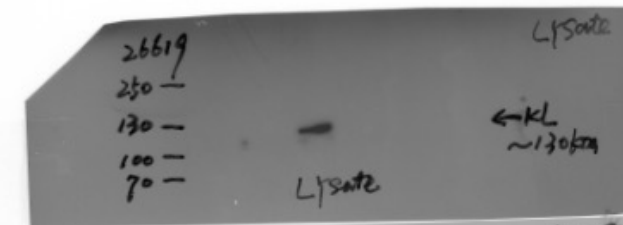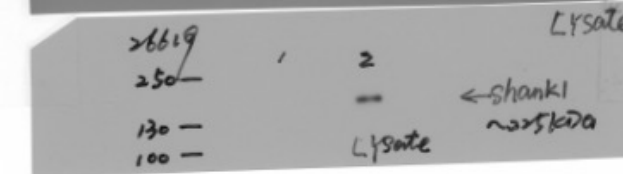

Fig 4D

Fig 4.D

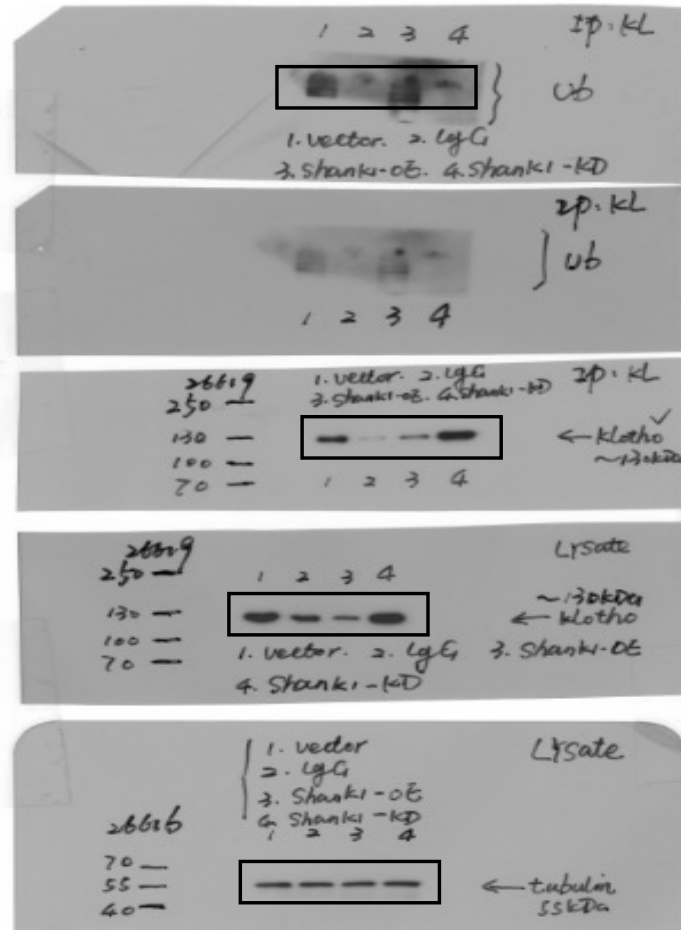

Fig 5A

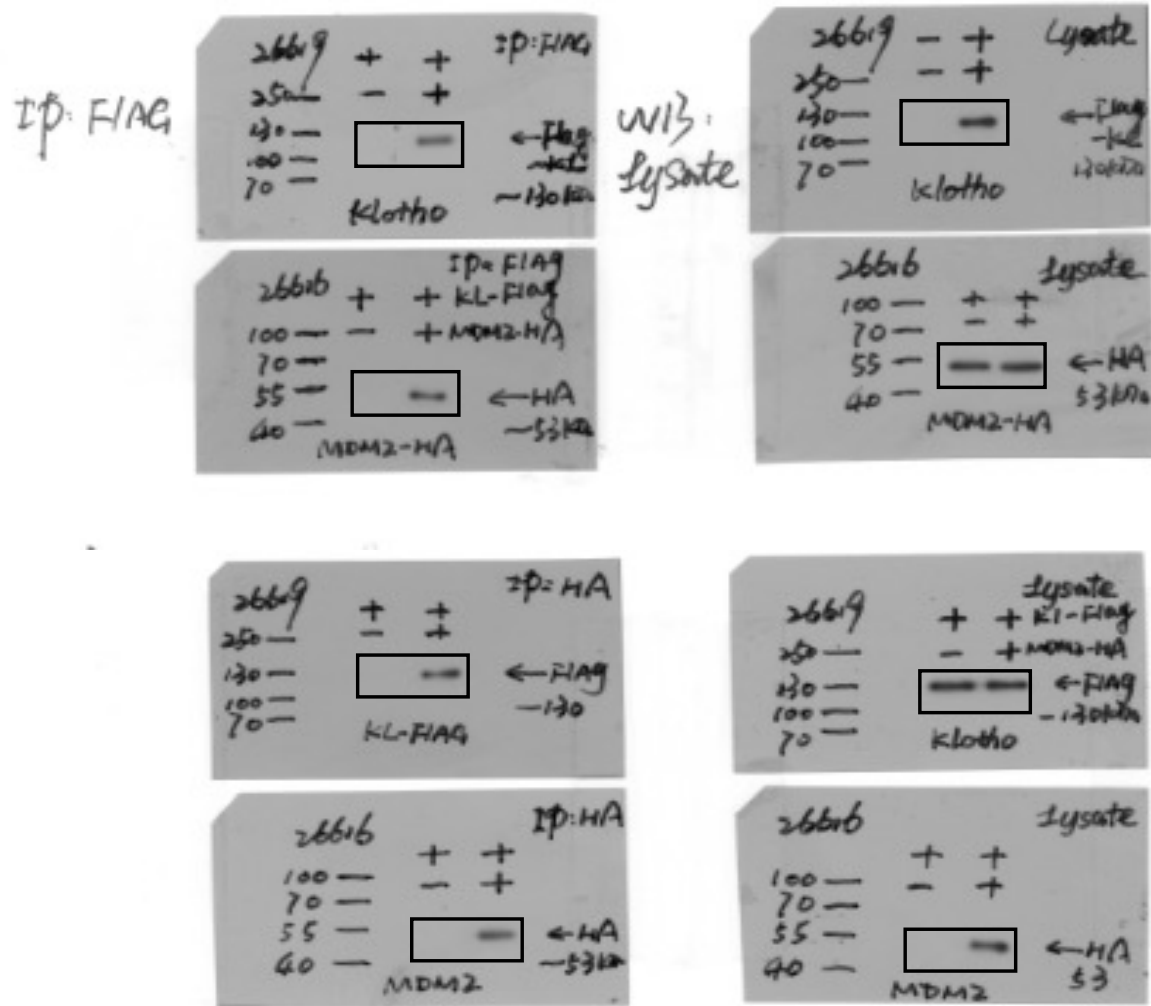

Fig 5C

Lysate

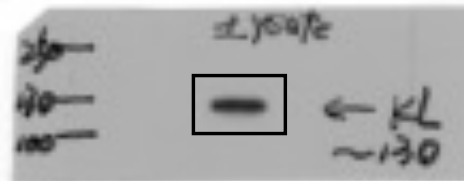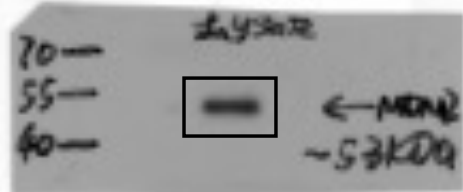

IP: MDM2

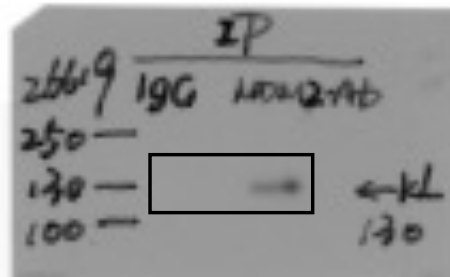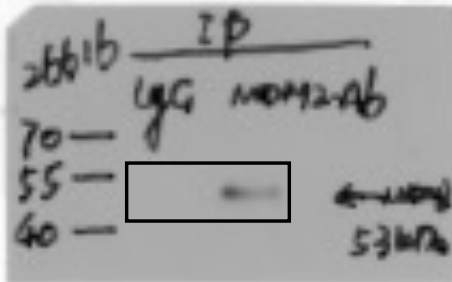

**Fig 5D**

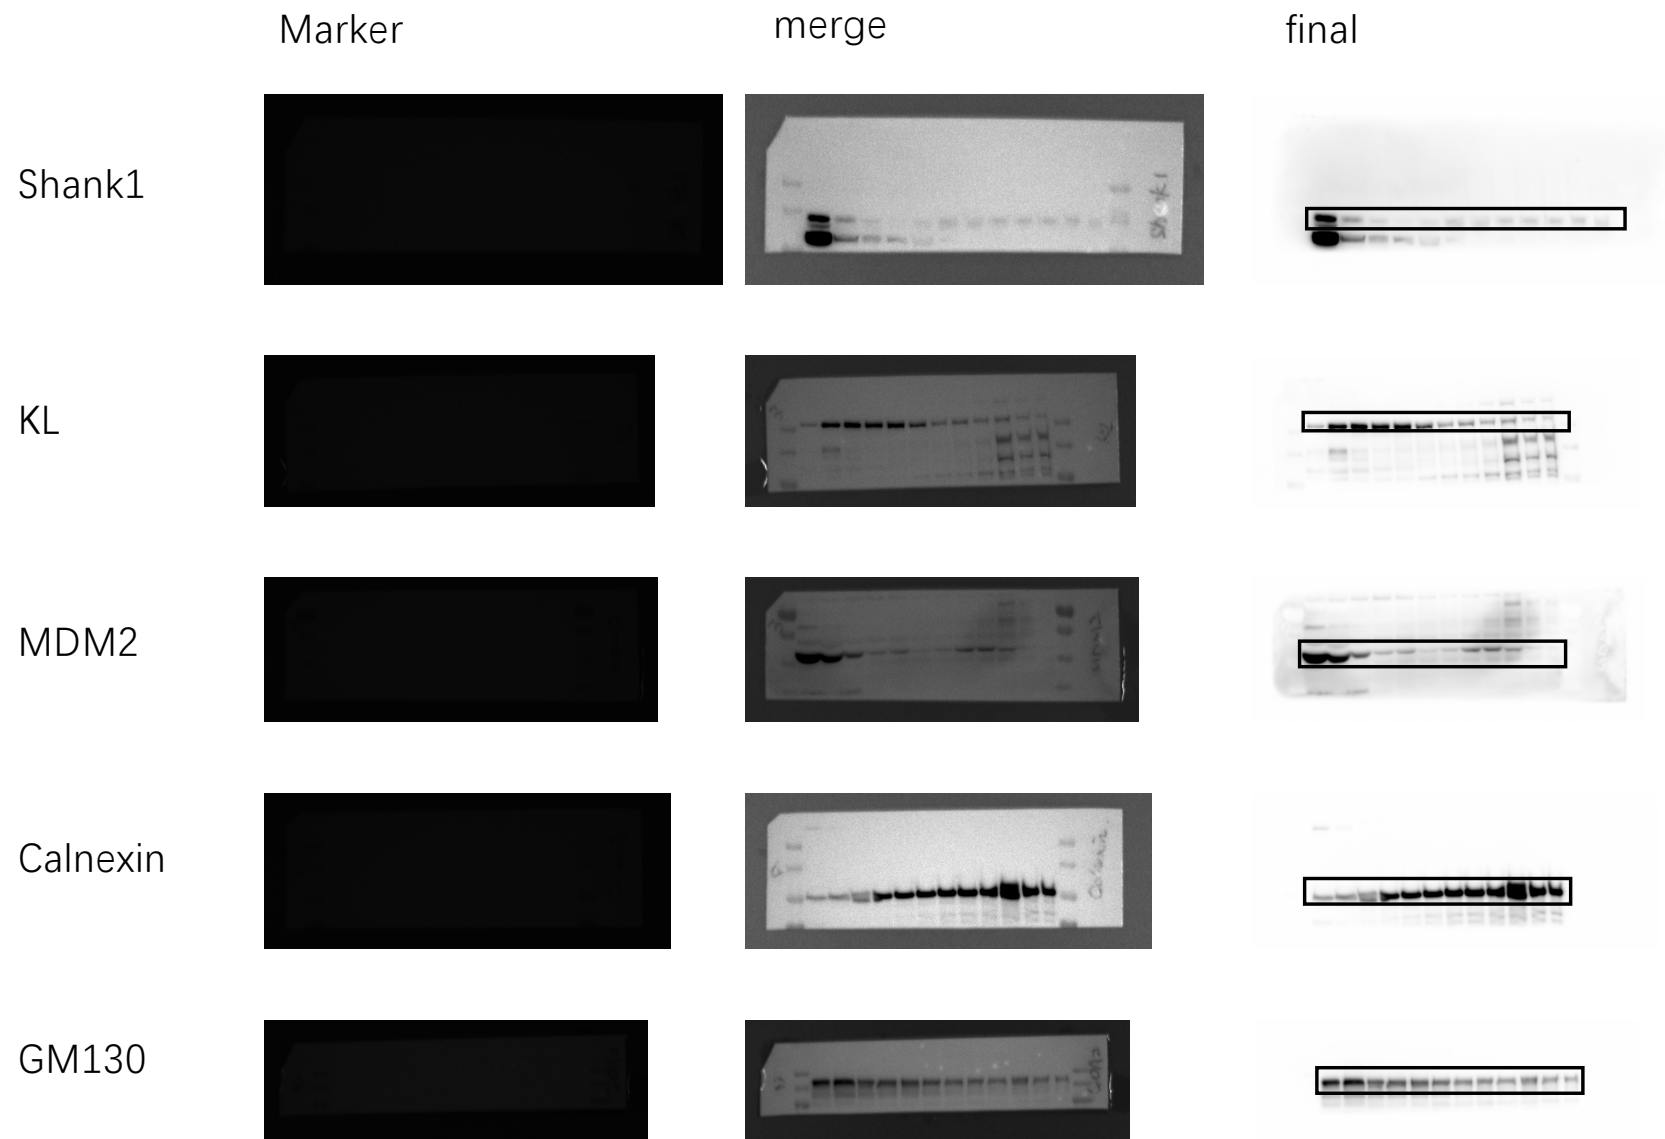

Fig 5E

Fig. 5E

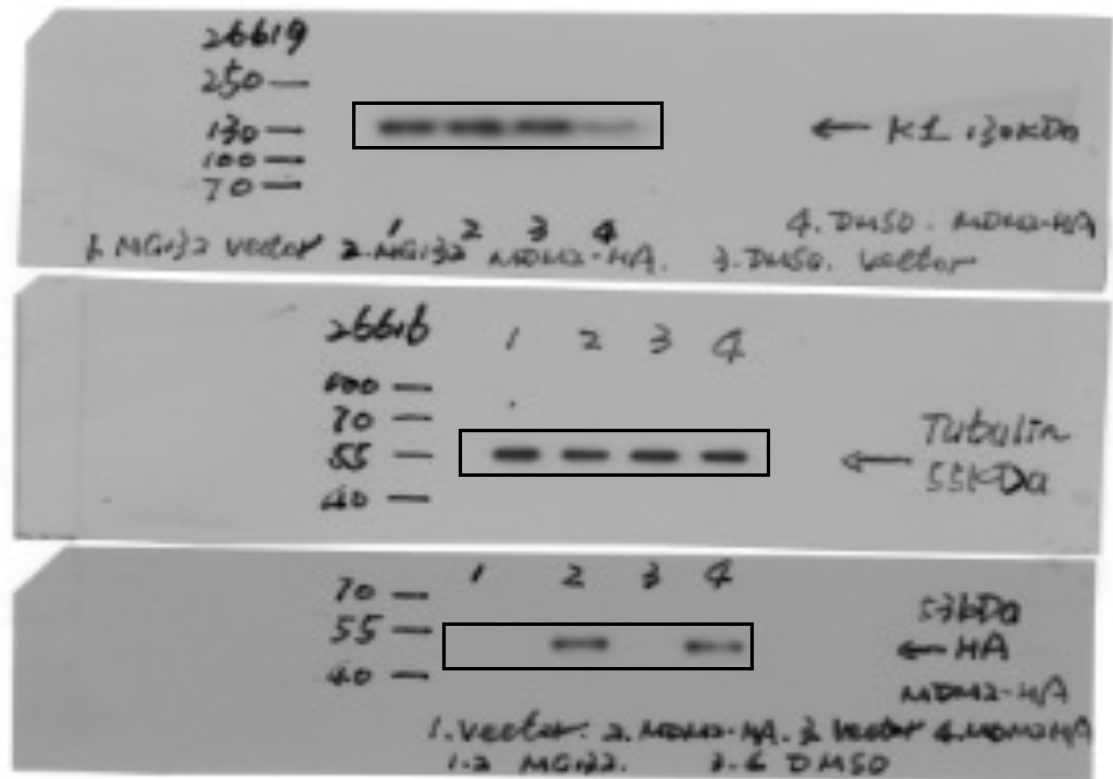

Fig 5G

Fig. 5C

Ip: Klotho

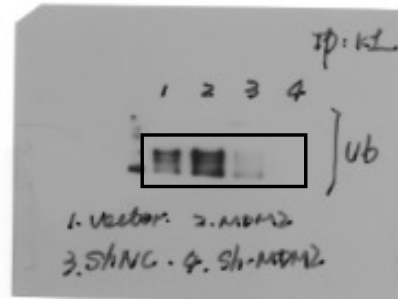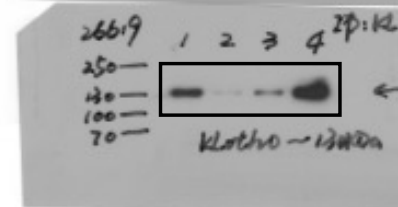

Lysate

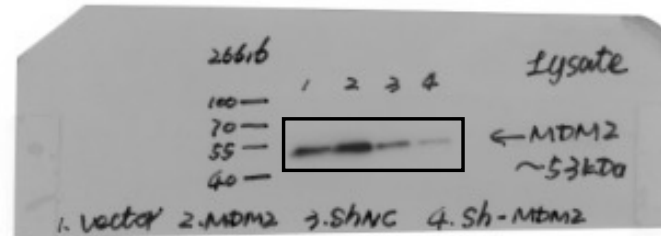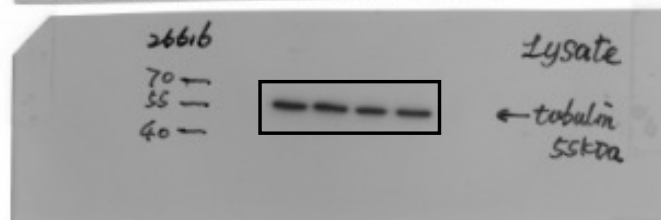

Fig 6A

Fig 6A

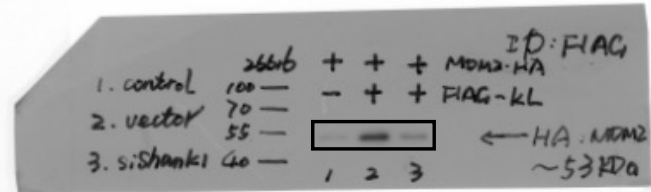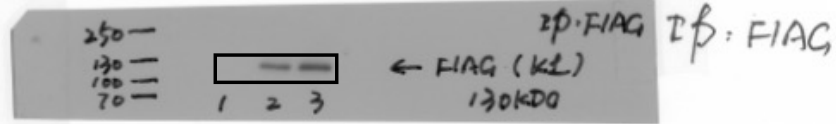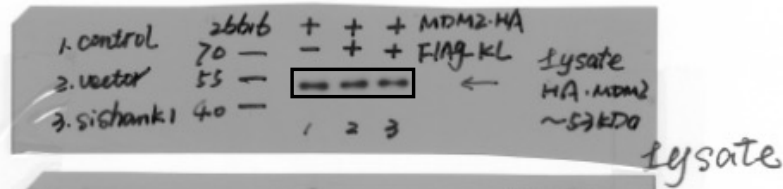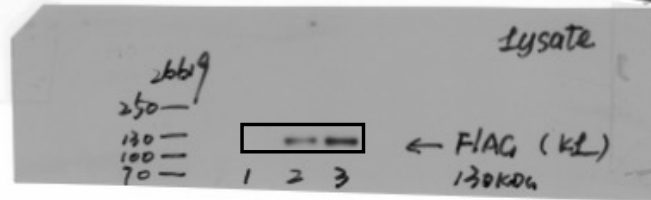



# Fig 6B

Fig 6B

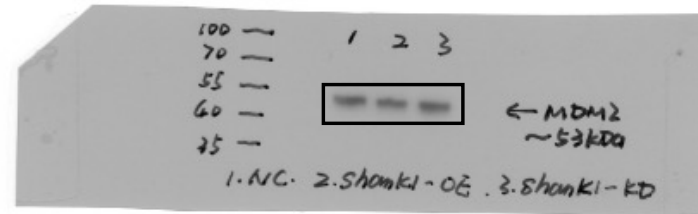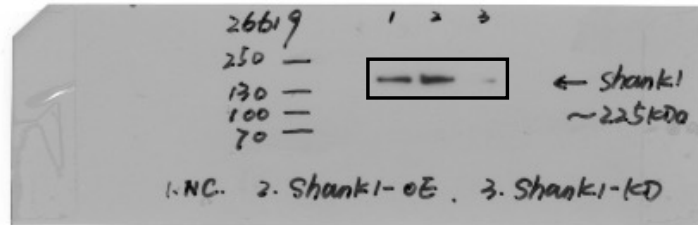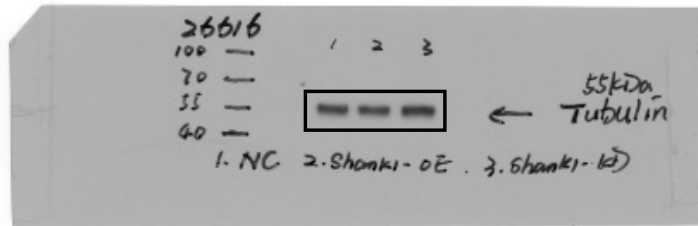

Fig 6C

Fig. 6C 共沉淀三分子复合物 (外-内)

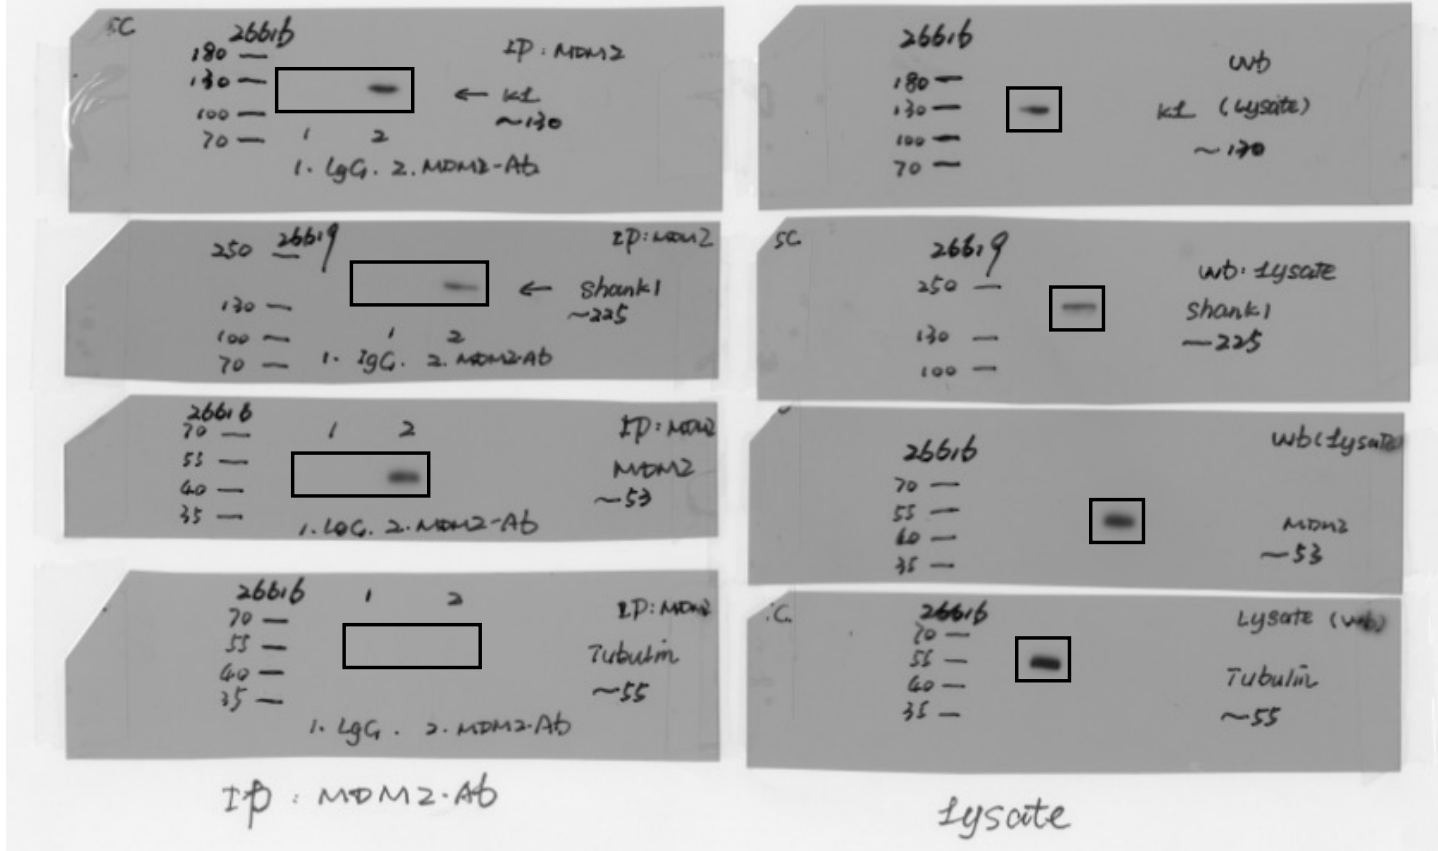

Fig 6D

Fig. 6D 形成三合复合物(内源)

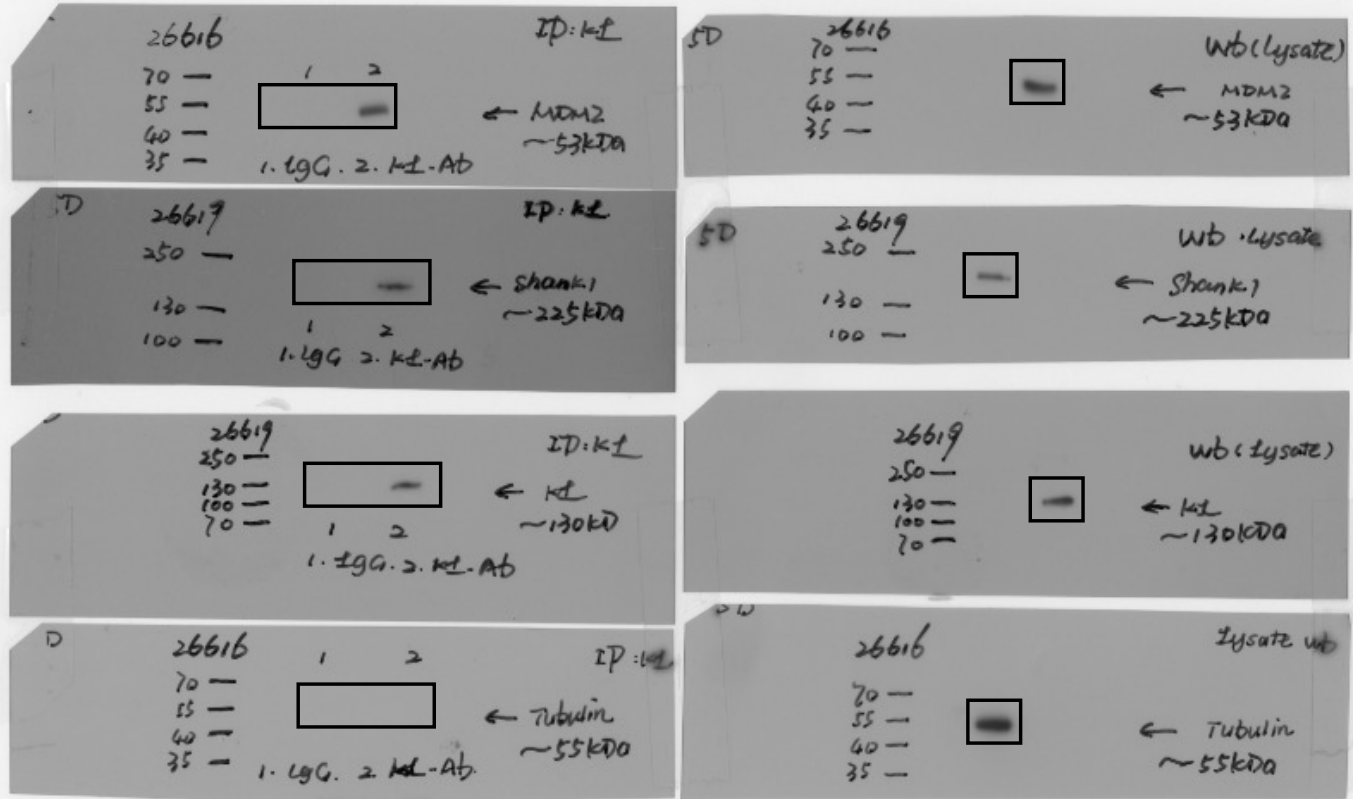

IP: Klotho

Lysate

# Fig 6E, F

Fig. 6E

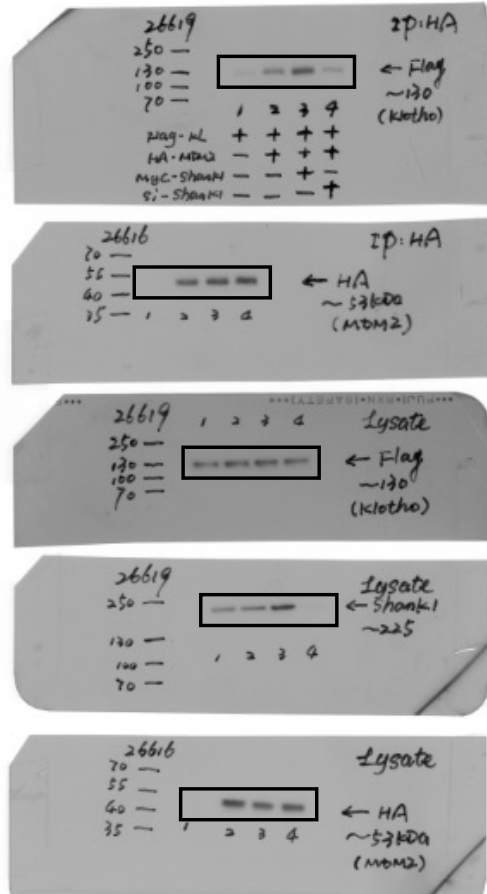

IP

Lysate

Fig. 6F

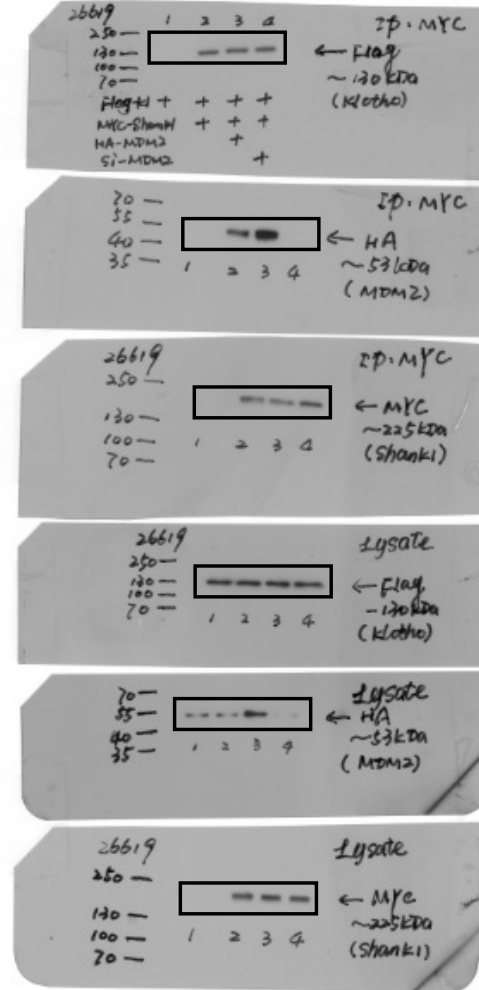

# Fig 6G, H

Fig. 6G

A549

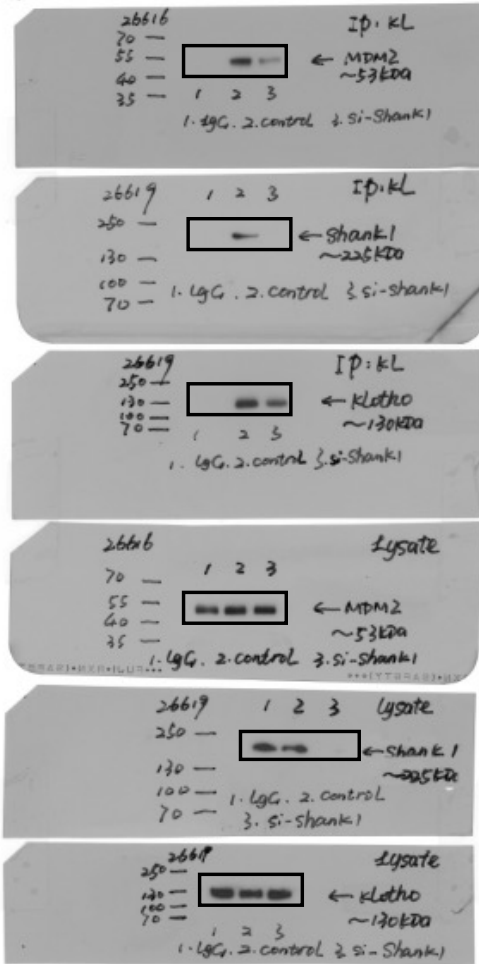

H1299

Fig. 6G 和 6H

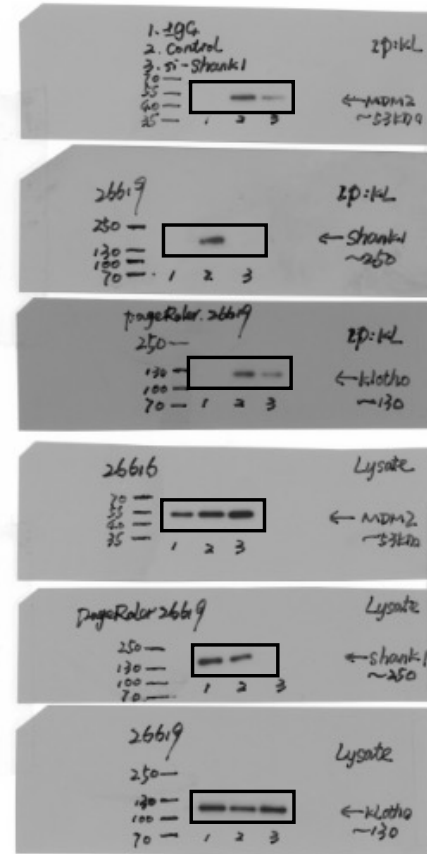

Fig 6I, J

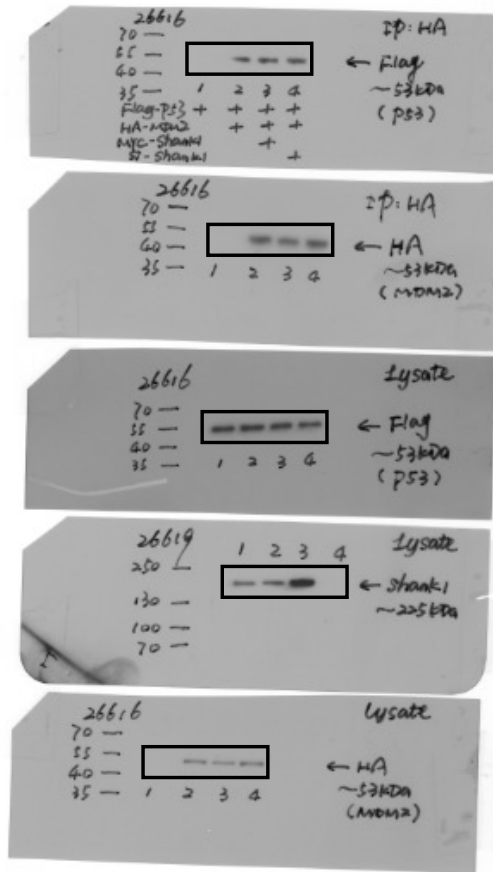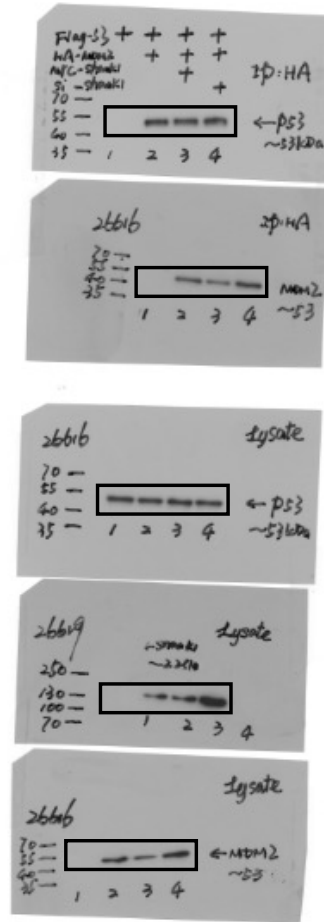

**Fig 6K**

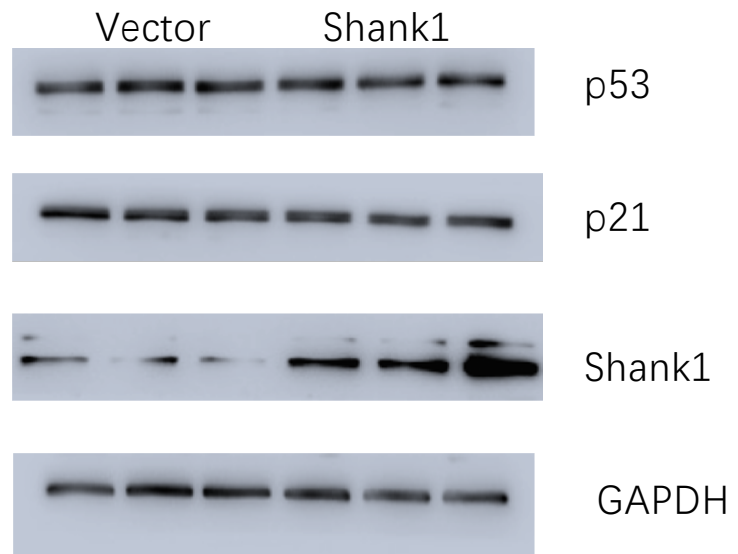

**Fig 7D**

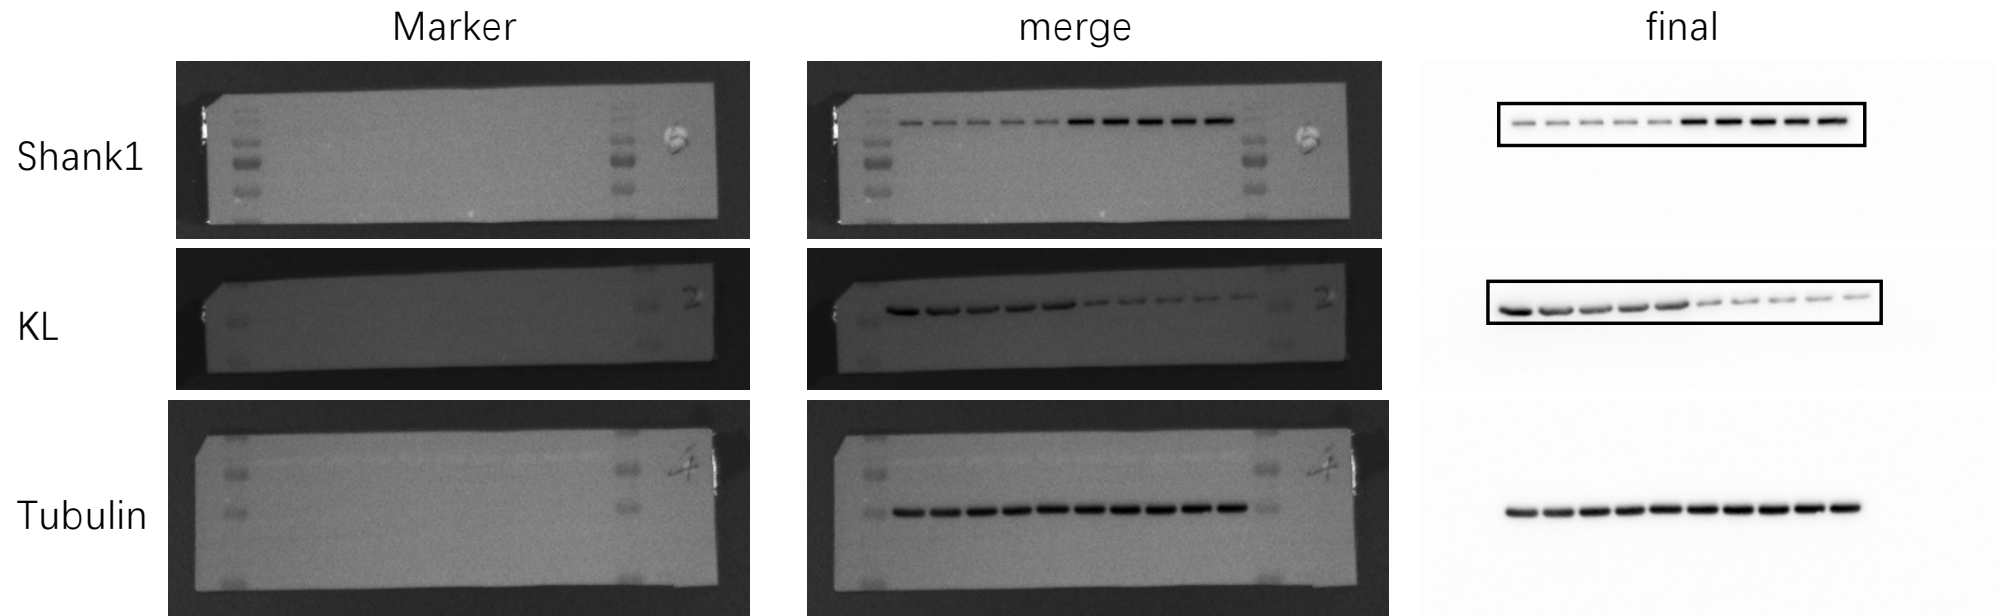



**Fig 7D**

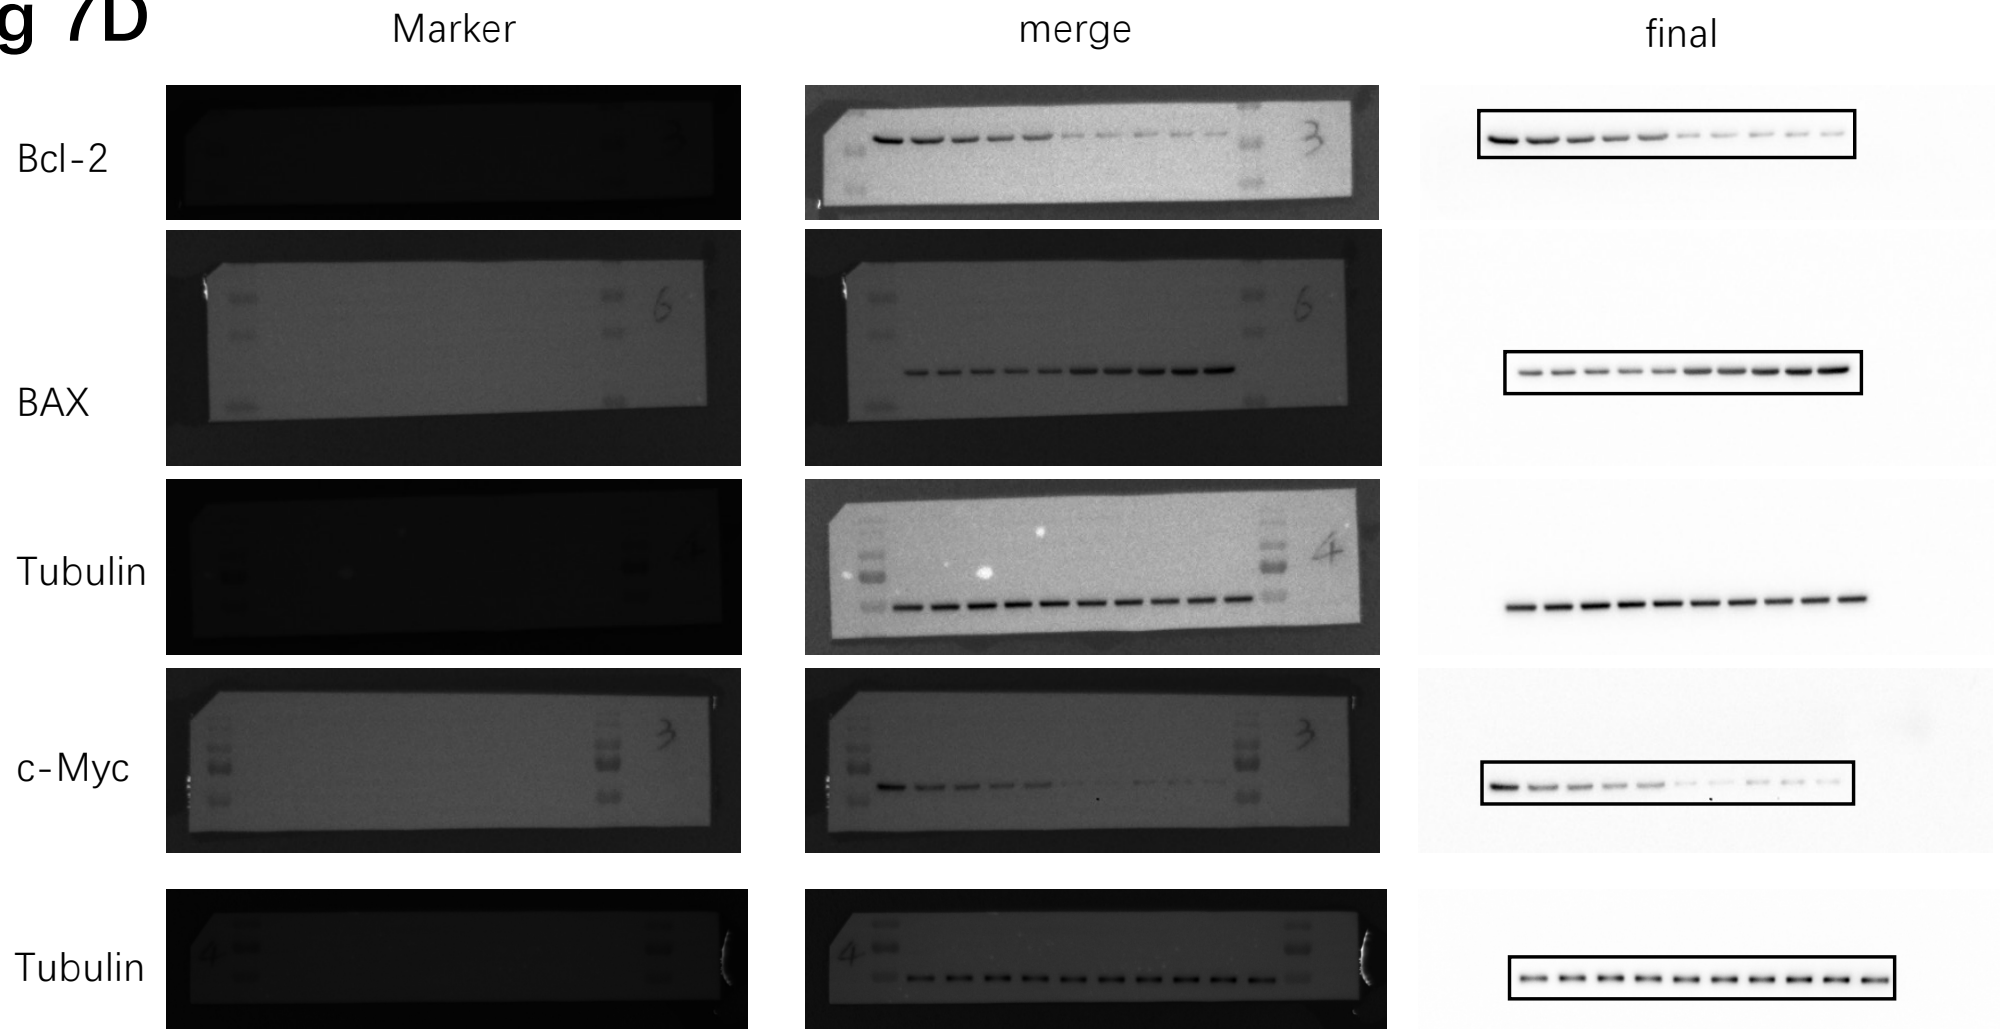

Supplement: 41419_2022_4860_MOESM1_ESM.pdf [file 41419_2022_4860_MOESM1_ESM.pdf]
